# Supplementary material
Source: PubMed Central journal article supplement (PMC4474530)

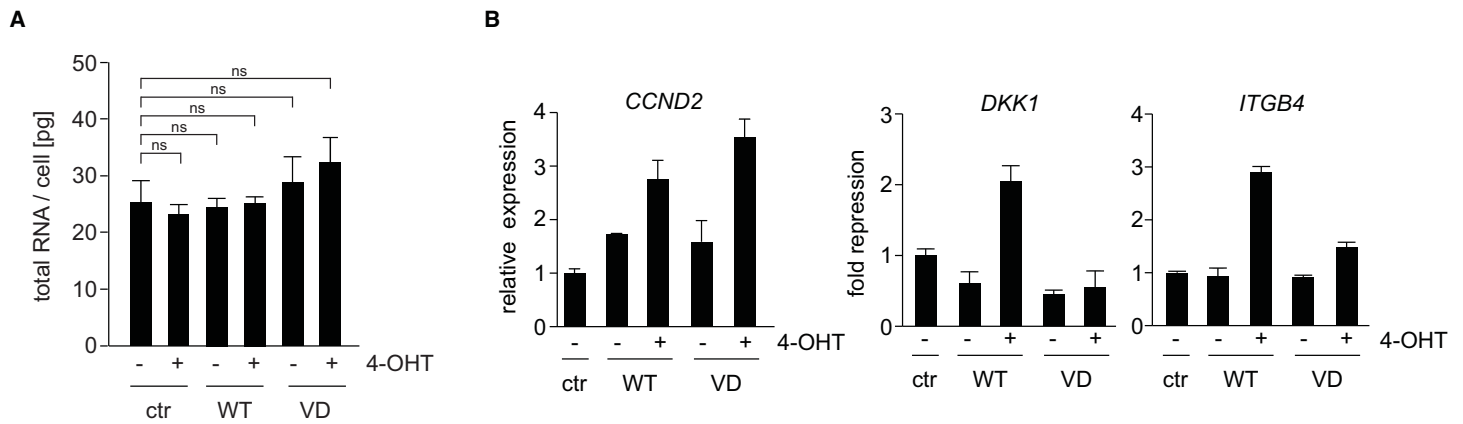

**C**

|                                                 |      | WT [4-OHT vs ctr] |       | VD [4-OHT vs ctr] |       |       |
|-------------------------------------------------|------|-------------------|-------|-------------------|-------|-------|
|                                                 | rank | # genes           | NES   | FDR               | NES   | FDR   |
| activated after MYC induction                   |      |                   |       |                   |       |       |
| ACOSTA_PROLIFERATION_INDEPENDENT_MYC_TARGETS_UP | 1    | 77                | 3.06  | 0.000             | 2.75  | 0.000 |
| SCHUHMACHER_MYC_TARGETS_UP                      | 2    | 78                | 2.34  | 0.000             | 2.28  | 0.000 |
| COLLER_MYC_TARGETS_UP                           | 4    | 24                | 2.31  | 0.000             | 2.29  | 0.000 |
| SCHLOSSER_MYC_TARGETS_REPRESSED_BY_SERUM        | 5    | 153               | 2.24  | 0.000             | 2.47  | 0.000 |
| KIM_MYC_AMPLIFICATION_TARGETS_UP                | 7    | 163               | 2.14  | 0.000             | 2.29  | 0.000 |
|                                                 |      |                   |       |                   |       |       |
|                                                 |      |                   |       |                   |       |       |
| repressed after MYC induction                   |      |                   |       |                   |       |       |
| ACOSTA_PROLIFERATION_INDEPENDENT_MYC_TARGETS_DN | 8    | 92                | -2.54 | 0.000             | -2.10 | 0.003 |
| DANG_REGULATED_BY_MYC_DN                        | 112  | 209               | -2.05 | 0.000             | -1.68 | 0.046 |
| DANG_MYC_TARGETS_DN                             | 302  | 26                | -1.77 | 0.014             | -1.51 | 0.101 |

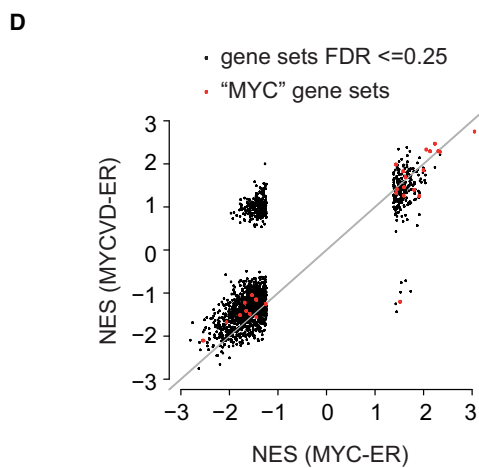

Supplement: embj0034-1554-sd4.pdf [file embj0034-1554-sd4.pdf]
