# Supplementary material
Source: PubMed Central journal article supplement (PMC4474530)
Supplement: embj0034-1554-sd9.pdf [file embj0034-1554-sd9.pdf]

Supplementary Table S1: Statistics of ChIP-Sequencing reads

| Sample        | mapped reads | Called peaks | Peaks<br>FDR < 0.1 | Peaks +/-5kb from TSS<br>FDR < 0.1 | Peaks +/-1.5kb from TSS<br>FDR < 0.1 |
|---------------|--------------|--------------|--------------------|------------------------------------|--------------------------------------|
| Input         | 15,040,211   | reference    |                    |                                    |                                      |
| HC20-Vector   | 15,119,997   | 3,549        | 7                  | 2                                  | 1                                    |
| HC20-WtER ctr | 15,120,524   | 12,541       | 7,033              | 2,457                              | 1,891                                |
| HC20-WtER OHT | 15,118,730   | 43,946       | 43,947             | 14,593                             | 10,887                               |
| HC20-VDER ctr | 15,120,129   | 9,475        | 1,948              | 608                                | 455                                  |
| HC20-VDER OHT | 15,114,488   | 24,180       | 24,174             | 7,979                              | 5,977                                |
| 10E2-Vector   | 13,314,598   | 7,572        | 5,992              | 1,766                              | 1,288                                |
| 10E2-WtER ctr | 13,317,836   | 10,959       | 9,892              | 3,049                              | 2,212                                |
| 10E2-WtER OHT | 13,312,133   | 16,330       | 16,331             | 5,117                              | 3,718                                |
| 10E2-VDER ctr | 13,314,951   | 9,757        | 8,124              | 2,333                              | 1,698                                |
| 10E2-VDER OHT | 13,312,529   | 11,856       | 11,855             | 3,489                              | 2,474                                |
