# Supplementary material
Source: PubMed Central journal article supplement (PMC4474530)

**A**

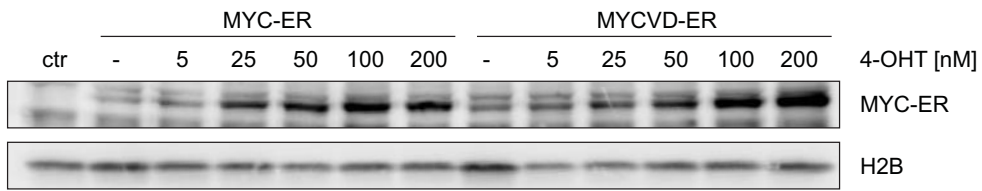

**B**

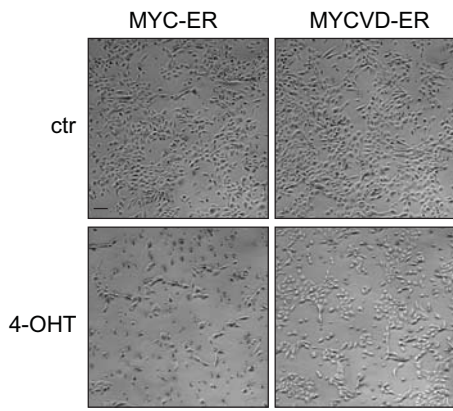

**C**

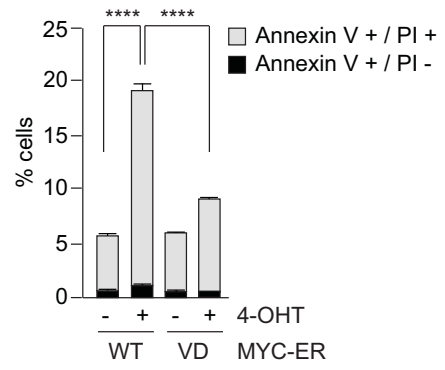

Supplement: embj0034-1554-sd2.pdf [file embj0034-1554-sd2.pdf]

**A**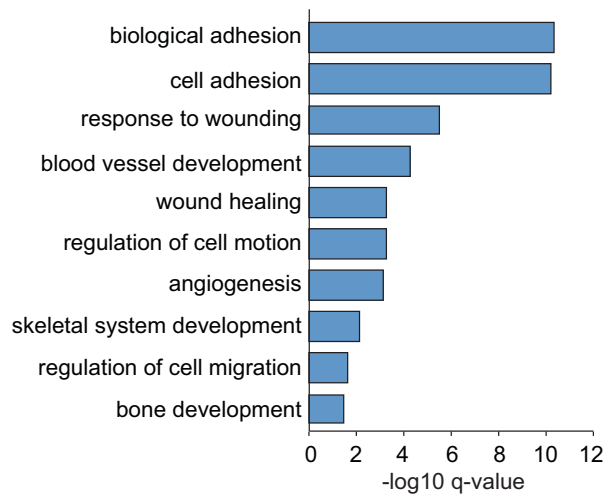**B**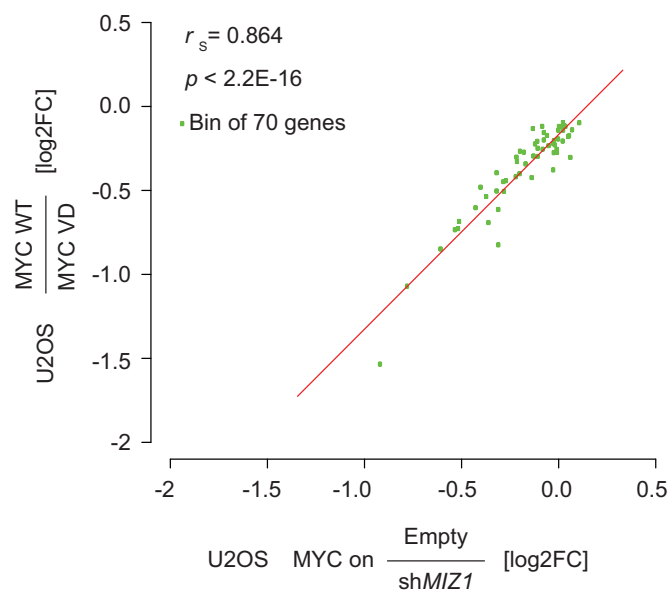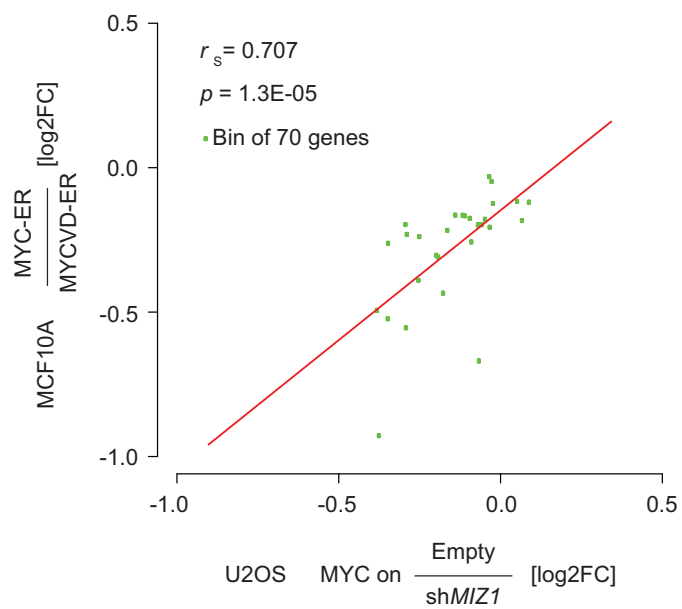

Supplement: embj0034-1554-sd5.pdf [file embj0034-1554-sd5.pdf]
